# Supplementary material
Source: publisher figshare collection journal article supplement (https://gsapubs.figshare.com/ndownloader/files/23301461)

# Recycling in debris-filled volcanic vents

Graettinger et al.

**Supplemental Table DR1:** 2015Pad1 crater geometries and buried subsurface tracer data.

| Blast | Energy<br>(J)        | Scaled<br>depth<br>(m/J <sup>1/3</sup> ) | depth<br>(m) | diameter<br>(m) | Depth of crater (m)<br>above tracer position |            | Location of exposed<br>tracer (position depth cm) |
|-------|----------------------|------------------------------------------|--------------|-----------------|----------------------------------------------|------------|---------------------------------------------------|
|       |                      |                                          |              |                 | A (0.5 m)                                    | B (0.75 m) |                                                   |
| 1     | 7.50x10 <sup>5</sup> | 3.85E-03                                 | 0.37         | 1.26            | 0.12                                         | 0.00       | -                                                 |
| 2     | 7.50x10 <sup>5</sup> | 3.85E-03                                 | 0.53         | 1.57            | 0.18                                         | 0.05       | A15: ejecta 2.13 m                                |
| 3     | 7.50x10 <sup>5</sup> | 3.85E-03                                 | 0.60         | 1.63            | 0.25                                         | 0.05       | -                                                 |
| 4     | 7.50x10 <sup>5</sup> | 3.85E-03                                 | 0.62         | 1.69            | 0.32                                         | 0.13       | A30: crater rim 0.89 m                            |
| 5     | 7.50x10 <sup>5</sup> | 3.85E-03                                 | 0.66         | 1.76            | 0.51                                         | 0.34       | A30: crater rim 0.89 m                            |
| 6     | 7.50x10 <sup>5</sup> | 3.85E-03                                 | 0.67         | 1.84            | 0.34                                         | 0.15       | A30: in crater 0.58 m                             |
| 7     | 7.50x10 <sup>5</sup> | 3.85E-03                                 | 0.70         | 1.89            | 0.43                                         | 0.22       | A30: in crater 0.45 m<br>A45: ejecta 6.43 m       |
| 8     | 7.50x10 <sup>5</sup> | 3.85E-03                                 | 0.74         | 1.89            | 0.45                                         | 0.25       | A30: in crater 0.47 m                             |
| 9     | 7.50x10 <sup>5</sup> | 3.85E-03                                 | 0.76         | 1.90            | 0.47                                         | 0.28       | A30: ejecta 1.13 m<br>A60: ejecta 4.10 m          |
| 10    | 7.50x10 <sup>5</sup> | 3.85E-03                                 | 0.81         | 2.02            | 0.46                                         | 0.24       | B15: in crater 0 m                                |

\*Tracer names include horizontal position A or B which indicates lateral distance from crater center and depth below original pad surface in cm e.g. A30. Final position distance is measured radially from the charge location.

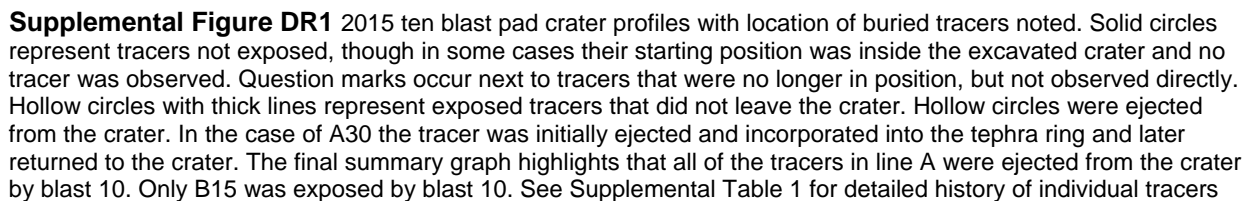

Supplement: Supplementary file 1 [file 23301461]
